# Supplementary material
Source: PubMed Central journal article supplement (PMC6597395)
Supplement: JB.00711-18-s0001.pdf [file JB.00711-18-s0001.pdf]

Supplemental information for:

**A xylose-inducible expression system and a CRISPRi-plasmid for targeted knock-down of gene expression  
in *Clostridioides difficile***

Ute Müh<sup>a</sup>, Anthony G. Pannullo<sup>a</sup>, David S. Weiss<sup>a</sup>, Craig D. Ellermeier<sup>a</sup>

<sup>a</sup>Department of Microbiology and Immunology, University of Iowa, Iowa City, Iowa, USA

# Fig S1

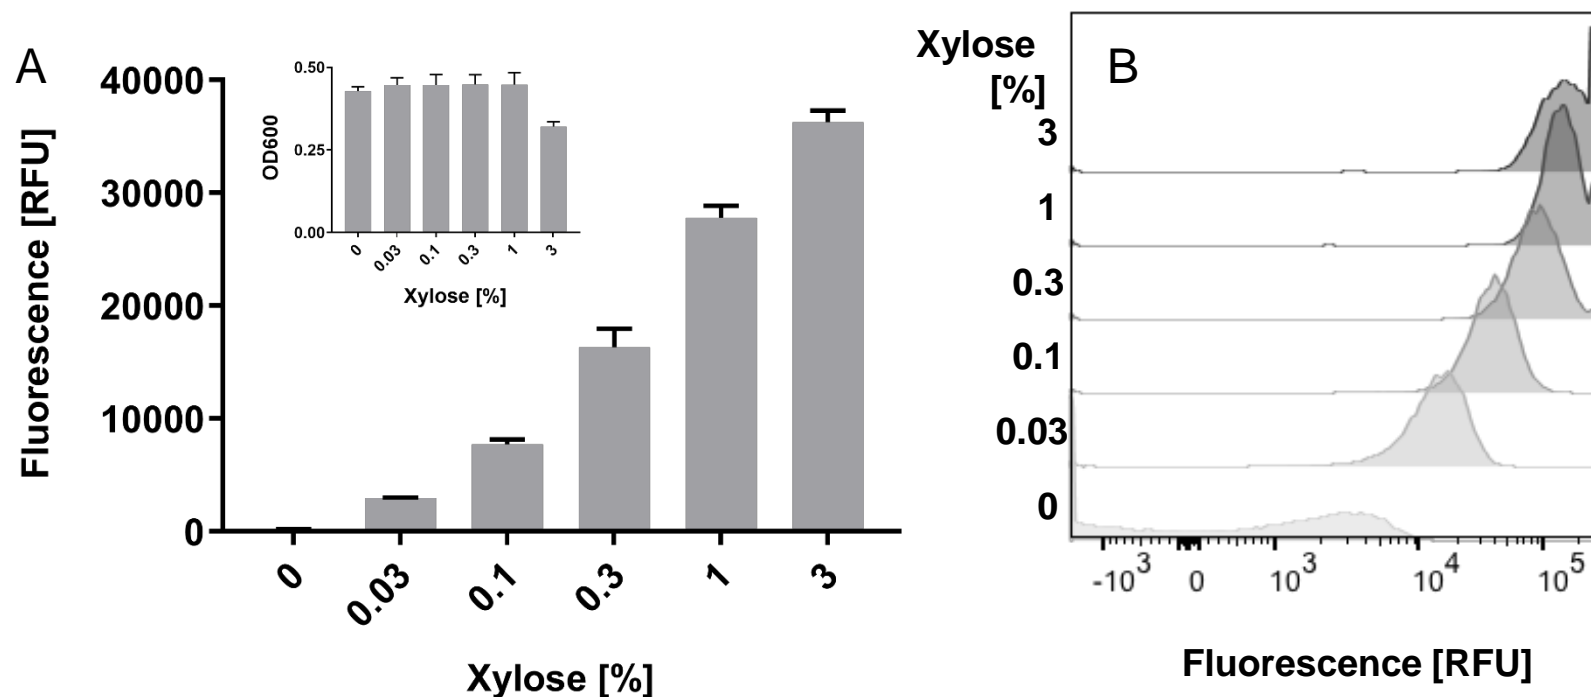

**Fig S1. Tunable induction from  $P_{xyl}$  in  $630\Delta erm$ .** An overnight culture of  $630\Delta erm/pAP114$  was diluted to a starting  $OD_{600} = 0.05$  into TY Thi<sub>10</sub> with the indicated concentration of xylose. Once cells had reached an  $OD_{600} = 0.5$  (~5h) they were fixed and processed to allow RFP development. (A) A plate reader was used to measure relative fluorescence and  $OD_{600}$  of bulk samples. (B) Flow cytometry was used to measure fluorescence of individual cells. RFU is relative fluorescence units normalized to  $OD_{600}$ . Data in (A) represent the mean and standard deviation of triplicate cultures. These results are representative of at least two independent experiments.

# Fig S2

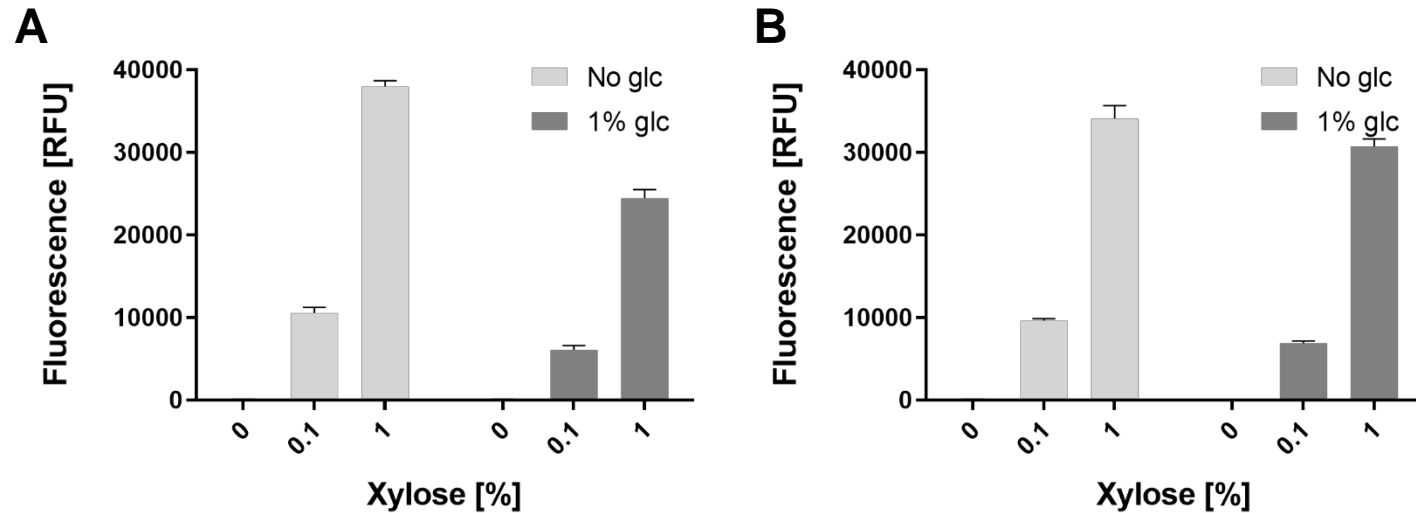

**Fig S2. Glucose has a modest effect on xylose induction.** (A) R20291/pAP114. (B) 630 $\Delta$ erm/pAP114. Procedures as described in the legend to Fig. S1. Data are graphed as the mean and standard deviation of triplicate cultures. Results are representative of at least two experiments.

# Fig S3

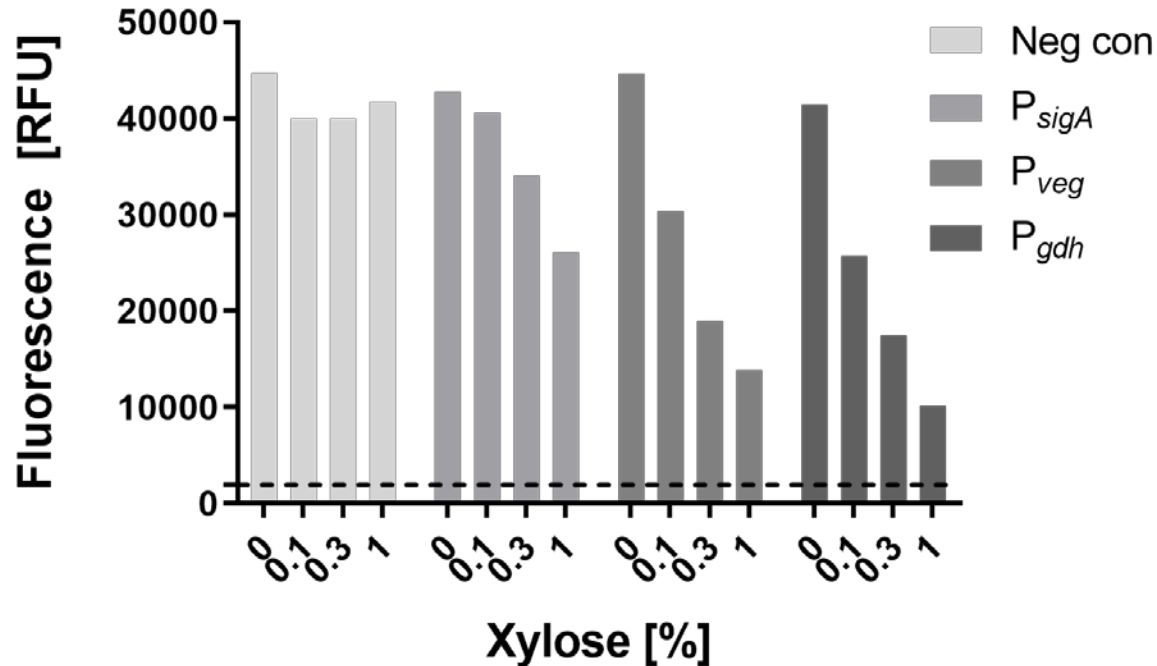

**Fig S3. Test of three sgRNA promoters for CRISPRi.** A set of CRISPRi plasmids was introduced into a *C. difficile* strain that expresses *rfp* constitutively. The CRISPRi plasmids express *dCas9* under  $P_{xyI}$  control and sgRNAs that target *rfp* under control of three constitutive promoters:  $P_{sigA}$  in pIA26,  $P_{veg}$  in pIA27, or  $P_{gdh}$  in pIA28. The negative control expressed  $neg^{sgRNA}$  from  $P_{gdh}$  (pIA25). Overnight cultures were used to inoculate TY Thi<sub>10</sub> with xylose as indicated at  $OD_{600} = 0.05$ . After 5 hours, cells were fixed and processed to allow RFP development. The dashed line indicates fluorescence seen with strain 630 $\Delta erm$ , which lacks *rfp*. RFU is relative fluorescence units normalized to  $OD_{600}$ . Results are representative of two experiments.

# Fig S4

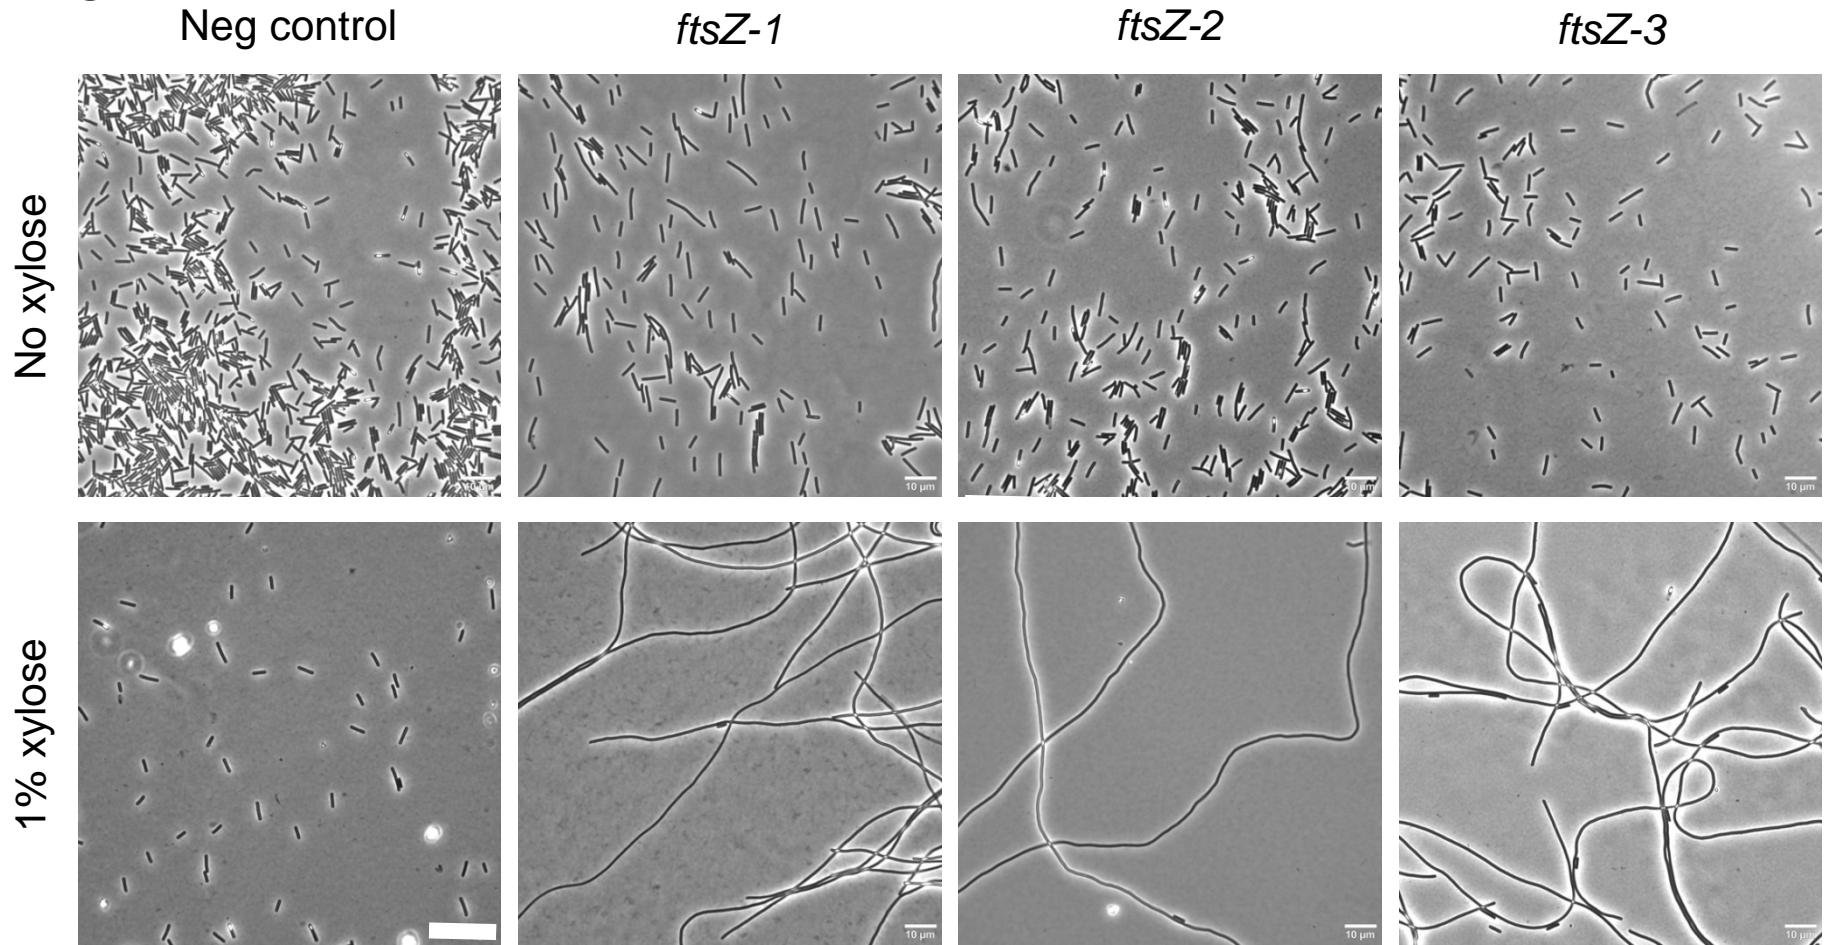

**Fig S4. CRISPRi of *ftsZ* induces filamentation.** Cells that grew from the undiluted samples spotted on the plates shown in Fig 4A were scraped from the plate and examined under phase contrast microscopy. Size bar on bottom left panel = 20 μm. Results are representative of two experiments.

Fig S5

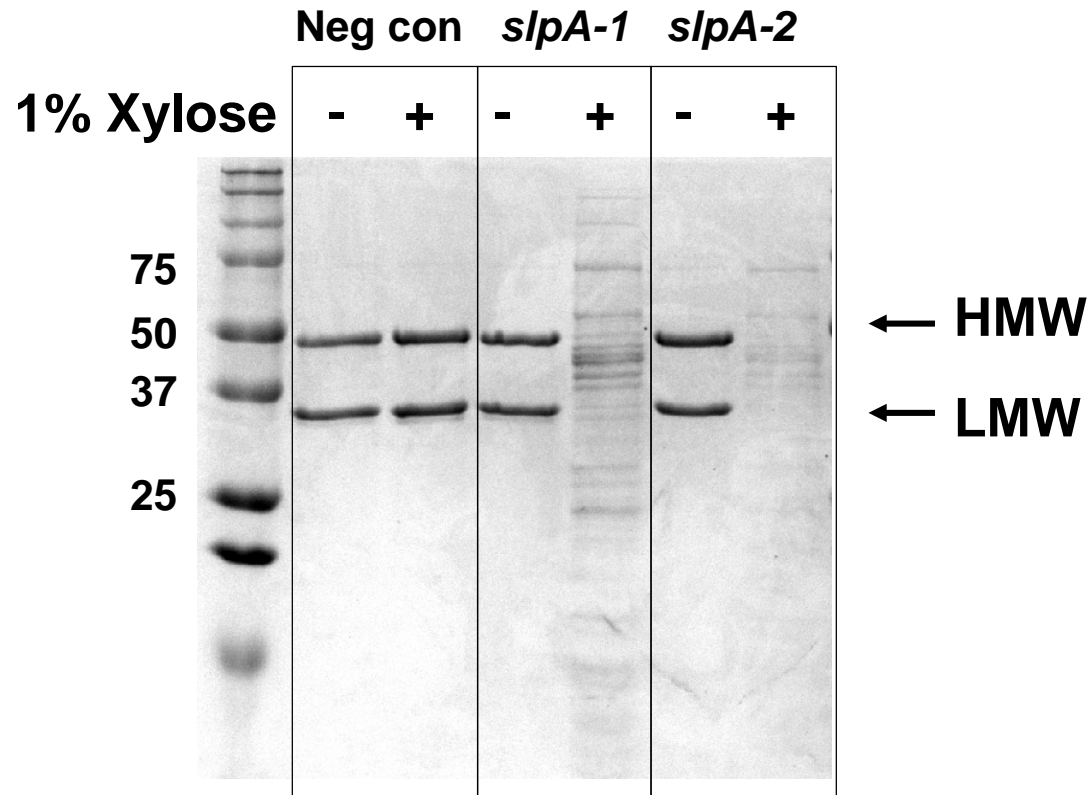

**Fig S5. CRISPRi depletion of SlpA.** Cultures of R20291 harboring pIA34 (negative control) or CRISPRi constructs with sgRNAs that target *slpA* (pIA38, pIA39) were grown in the presence or absence of 1% xylose as described in the legend to Fig. 5. Whole cell extracts were analyzed by SDS-PAGE followed by Coomassie staining. Molecular mass markers in kilodaltons are indicated to the left. The high molecular weight band (HMW) and the low molecular weight band (LMW) of SlpA are marked by arrows.

# Fig S6

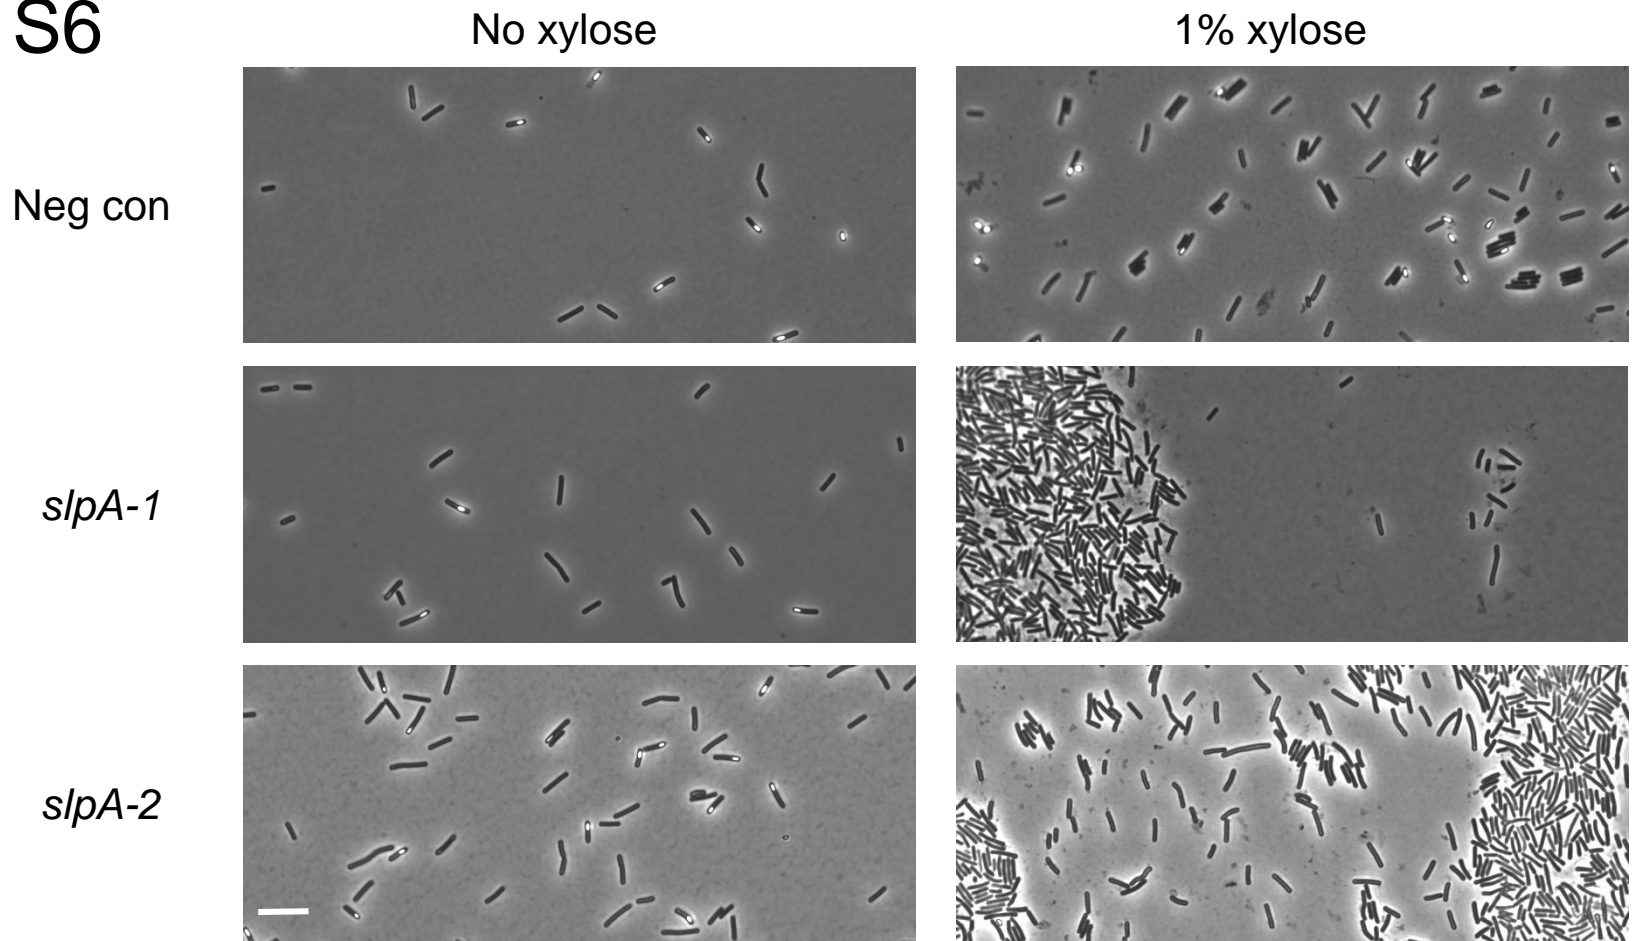

**Fig S6. CRISPRi of *slpA* impairs sporulation but does not affect cell morphology.** R20291 cells that grew from the undiluted samples spotted on the plates shown in Fig. 5A were scraped from the plate and examined under phase contrast microscopy. The phase-bright objects are spores. In the presence of 1% xylose, the numbers of spores were visibly reduced for the CRISPRi-*slpA*<sup>sgRNA</sup> constructs but not the negative control. Size bar on bottom left panel = 10  $\mu$ m. Results are representative of two experiments.

# Fig S7

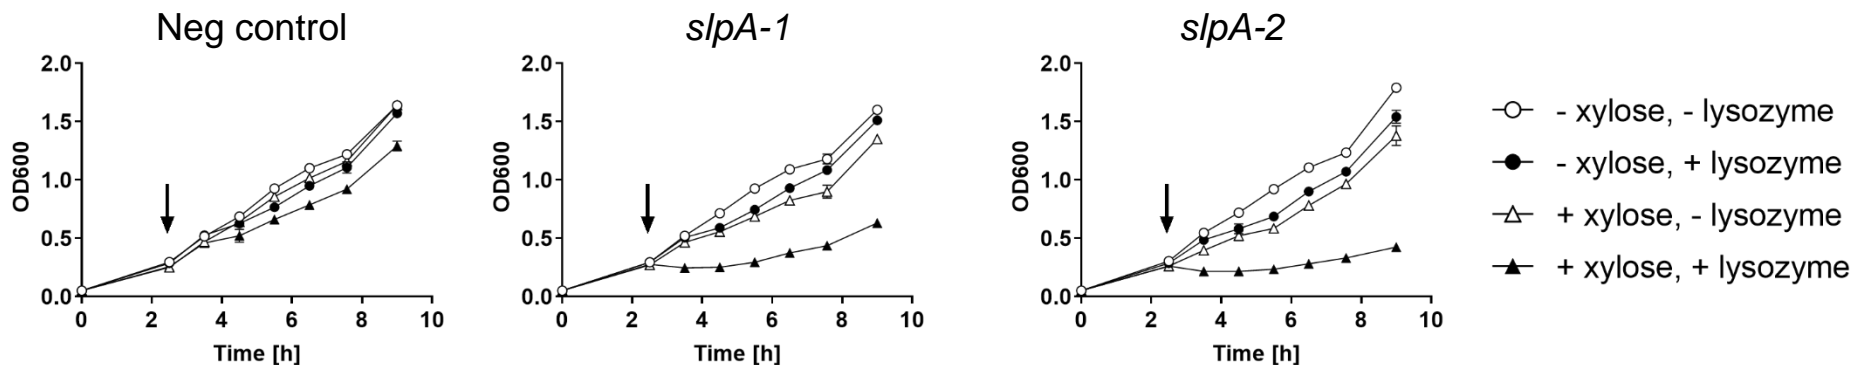

**Fig S7. CRISPRi depletion of SlpA increases sensitivity to lysozyme.** Duplicate cultures of R20291 harboring pIA34 (negative control) or CRISPRi constructs with sgRNAs that target *slpA* (pIA38, pIA39) were inoculated to  $OD_{600} = 0.05$  in TY Thi<sub>10</sub> with or without xylose. After 2.5h (arrows) lysozyme was added to 0.5 mg/mL and growth was monitored by  $OD_{600}$  for the next 6.5h. Results are representative of two experiments.



TABLE S1. Plasmids used in this study

| Plasmid         | Relevant features                                                                                                                                                              | Parent vector | Restriction enzymes to digest parent vector | PCR primers           | PCR template    | Comments                                                                                                                                                                | Reference                  |
|-----------------|--------------------------------------------------------------------------------------------------------------------------------------------------------------------------------|---------------|---------------------------------------------|-----------------------|-----------------|-------------------------------------------------------------------------------------------------------------------------------------------------------------------------|----------------------------|
| pJK02           | $P_{tet}::Cas9-opt$ $P_{gdh}::sgRNA$ <i>colE1</i> <i>CD6 ori</i> <i>RP4oriT-traJ catP</i>                                                                                      |               |                                             |                       |                 |                                                                                                                                                                         | McAllister et al 2017      |
| pJMP2           | $P_{veg}::sgRNA$ <i>colE1 catP amp spc</i>                                                                                                                                     |               |                                             |                       |                 |                                                                                                                                                                         | Peters et al 2016          |
| pJMP4           | $P_{veg}::rfp$ <i>colE1 catP amp spc</i>                                                                                                                                       |               |                                             |                       |                 |                                                                                                                                                                         | Peters et al 2016          |
| pRFP185         | <i>E. coli-C. difficile</i> shuttle vector with tetracycline-inducible promoter; $P_{tet}::gusA$ <i>tetR CD6ori RP4oriT-traJ pMB1ori catP</i>                                  |               |                                             |                       |                 |                                                                                                                                                                         | Fagan and Fairweather 2011 |
| pdCas9_bacteria | $P_{tet}::dCas9$ <i>tetR ori15A catP</i>                                                                                                                                       |               |                                             |                       |                 | Addgene 44249                                                                                                                                                           | Qi et al 2013              |
| pMTL-YN1C       | <i>E. coli-C. difficile</i> shuttle vector for inserting genes into <i>C. difficile</i> chromosome while restoring <i>pyrE</i> ; <i>colE1 RP4oriT-TraJ CB102ori-repH' catP</i> |               |                                             |                       |                 |                                                                                                                                                                         | Ng et al 2013              |
| pDSW1728        | $P_{tet}::mCherryOpt$ <i>catP</i>                                                                                                                                              |               |                                             |                       |                 |                                                                                                                                                                         | Ransom et al 2015          |
| pDSW1963        | $P_{veg}::rfp$ <i>catP</i>                                                                                                                                                     | pDSW1728      | BamHI, NheI                                 | P2281+P2282           | pJMP4           | $P_{veg}::rfp$ amplified from pJMP4 replaces $P_{tet}::mCherryOpt$ in pDSW1728                                                                                          | This study                 |
| pIA17           | $P_{veg}::rfp$ in pMTL-YN1C <i>catP</i>                                                                                                                                        | pMTL-YN1C     | NotI, XhoI                                  | 4057+4058             | pDSW1963        | $P_{veg}::rfp$ amplified from pDSW1963 is cloned into allelic exchange vector pMTL-YN1C                                                                                 | This study                 |
| pCE531          | $P_{tet}::dCas9$ <i>catP</i>                                                                                                                                                   | pRFP185       | SacI, BamHI                                 | 3083+3084             | pdCas9_bacteria | <i>dCas9</i> amplified from pdCas9_bacteria cloned under $P_{tet}$ control in pRFP185; primer 3084 includes $P_{sigA}$ , and MscI and NotI sites for next cloning steps | This study                 |
| pIA18           | $P_{tet}::dCas9$ $P_{sigA}::sgRNA-neg$ <i>catP</i>                                                                                                                             | pCE531        | MscI, NotI                                  | 4083+4084             | pJK02           | <i>sgRNA</i> handle amplified from pJK02 and inserted into pCE531; bp-region for <i>sgRNA-neg</i> included                                                              | This study                 |
| pIA19           | $P_{xylB}::mCherryOpt$ <i>catP</i>                                                                                                                                             | pDSW1728      | SacI, KpnI                                  | 4102+4103             | gDNA R20291     | <i>xylR</i> through first 63 nt of <i>xylB</i> ( $P_{xylB}$ ) replaces $P_{tet}$ in pDSW1728 to control <i>mCherryOpt</i>                                               | This study                 |
| pAP114          | $P_{xyl}::mCherryOpt$ <i>catP</i>                                                                                                                                              | pDSW1728      | SacI, KpnI                                  | 4102+4162             | gDNA R20291     | <i>xylR</i> and region immediately upstream of <i>xylB</i> ( $P_{xyl}$ ) replaces $P_{tet}$ in pDSW1728 to control <i>mCherryOpt</i>                                    | This study                 |
| pIA20           | $P_{xylB}::dCas9$ $P_{sigA}::sgRNA-neg$ <i>catP</i>                                                                                                                            | pIA19         | PstI (6271 bp)                              | 4135+4136             | pIA18           | <i>dCas9</i> $P_{sigA}::sgRNA-neg$ <i>traJ</i> amplified from pIA18 replaces <i>mCherryOpt traJ</i> in pIA19                                                            | This study                 |
| pIA21           | $P_{xyl}::dCas9$ $P_{sigA}::sgRNA-neg$ <i>catP</i>                                                                                                                             | pIA20         | PacI, BstZ171                               | 4168+4169 & 4170+4171 | pIA20           | Delete 63 nt of <i>xylB</i> from promoter region driving <i>dCas9</i> expression (i.e. convert $P_{xylB}$ to $P_{xyl}$ )                                                | This study                 |
| pIA24           | $P_{xyl}::dCas9$ $P_{veg}::sgRNA-neg$ <i>catP</i>                                                                                                                              | pIA21         | AvrII, MscI                                 | 4143+4144             | pJMP2           | $P_{veg}$ amplified from pJMP2 replaces $P_{sigA}$ in pIA21                                                                                                             | This study                 |
| pIA25           | $P_{xyl}::dCas9$ $P_{gdh}::sgRNA-neg$ <i>catP</i>                                                                                                                              | pIA24         | XhoI, MscI                                  | 4172+4173             | pJK02           | $P_{gdh}$ amplified from pJK02 replaces $P_{veg}$ in pIA24                                                                                                              | This study                 |
| pIA26           | $P_{xyl}::dCas9$ $P_{sigA}::sgRNA-rfp$ <i>catP</i>                                                                                                                             | pIA21         | MscI, NotI                                  | 4184+4084             | pIA21           | Replace <i>sgRNA-neg</i> with <i>sgRNA-rfp</i>                                                                                                                          | This study                 |
| pIA27           | $P_{xyl}::dCas9$ $P_{veg}::sgRNA-rfp$ <i>catP</i>                                                                                                                              | pIA24         | MscI, NotI                                  | 4185+4084             | pIA24           | Replace <i>sgRNA-neg</i> with <i>sgRNA-rfp</i>                                                                                                                          | This study                 |
| pIA28           | $P_{xyl}::dCas9$ $P_{gdh}::sgRNA-rfp$ <i>catP</i>                                                                                                                              | pIA25         | MscI, NotI                                  | 4186+4084             | pIA25           | Replace <i>sgRNA-neg</i> with <i>sgRNA-rfp</i>                                                                                                                          | This study                 |

TABLE S1. Plasmids used in this study

| Plasmid | Relevant features                                        | Parent vector | Restriction enzymes to digest parent vector | PCR primers           | PCR template | Comments                                                                                                          | Reference  |
|---------|----------------------------------------------------------|---------------|---------------------------------------------|-----------------------|--------------|-------------------------------------------------------------------------------------------------------------------|------------|
| pIA33   | $P_{xyI}::dCas9-opt$ $P_{gdh}::sgRNA-rfp$ <i>catP</i>    | pIA28         | Sall, XhoI                                  | 4197+4198 & 4199+4200 | pJK02        | <i>cas9-opt</i> amplified from pJK02, mutated to <i>dCas9-opt</i> and inserted into pIA28 to replace <i>dCas9</i> | This study |
| pIA34   | $P_{xyI}::dCas9-opt$ $P_{gdh}::sgRNA-neg$ <i>catP</i>    | pIA33         | MscI, NotI                                  | 4238+4084             | pIA33        | Replace <i>sgRNA-rfp</i> with <i>sgRNA-neg</i>                                                                    | This study |
| pIA35   | $P_{xyI}::dCas9-opt$ $P_{gdh}::sgRNA-ftsZ-1$ <i>catP</i> | pIA33         | MscI, NotI                                  | 4234+4084             | pIA33        | Replace <i>sgRNA-rfp</i> with <i>sgRNA-ftsZ-1</i>                                                                 | This study |
| pIA36   | $P_{xyI}::dCas9-opt$ $P_{gdh}::sgRNA-ftsZ-2$ <i>catP</i> | pIA33         | MscI, NotI                                  | 4235+4084             | pIA33        | Replace <i>sgRNA-rfp</i> with <i>sgRNA-ftsZ-2</i>                                                                 | This study |
| pIA37   | $P_{xyI}::dCas9-opt$ $P_{gdh}::sgRNA-ftsZ-3$ <i>catP</i> | pIA33         | MscI, NotI                                  | 4236+4084             | pIA33        | Replace <i>sgRNA-rfp</i> with <i>sgRNA-ftsZ-3</i>                                                                 | This study |
| pIA38   | $P_{xyI}::dCas9-opt$ $P_{gdh}::sgRNA-slpA-1$ <i>catP</i> | pIA33         | MscI, NotI                                  | 4277+4084             | pIA33        | Replace <i>sgRNA-rfp</i> with <i>sgRNA-slpA-1</i>                                                                 | This study |
| pIA39   | $P_{xyI}::dCas9-opt$ $P_{gdh}::sgRNA-slpA-2$ <i>catP</i> | pIA33         | MscI, NotI                                  | 4278+4084             | pIA33        | Replace <i>sgRNA-rfp</i> with <i>sgRNA-slpA-2</i>                                                                 | This study |
| pIA40   | $P_{xyI}::dCas9-opt$ $P_{gdh}::sgRNA-pbp-1$ <i>catP</i>  | pIA33         | MscI, NotI                                  | 4279+4084             | pIA33        | Replace <i>sgRNA-rfp</i> with <i>sgRNA-pbp-1</i>                                                                  | This study |
| pIA41   | $P_{xyI}::dCas9-opt$ $P_{gdh}::sgRNA-pbp-2$ <i>catP</i>  | pIA33         | MscI, NotI                                  | 4280+4084             | pIA33        | Replace <i>sgRNA-rfp</i> with <i>sgRNA-pbp-2</i>                                                                  | This study |

TABLE S2. Primers used in this study

| Oligo | Sequence                                                                                        | Relevant features                                                     |
|-------|-------------------------------------------------------------------------------------------------|-----------------------------------------------------------------------|
| 3083  | GTTAACAGATCT <b>GAGCTC</b> GATCTAAAGAGGAGAAAGGATC                                               | Bold: SacI                                                            |
| 3084  | GTTTTATTTAAACTTATAG <b>GATCCGCGCCGC TGGCCA</b> ATTATACCTAGGACTGAGCTAGCTGCAAAGCGTTCACCGACAAACAAC | Bold & underlined: BamHI; Italic: NotI; Bold: MscI; Underlined: PsigA |
| 4083  | AGTCCTAGGTATAAT <b>TGGCCAGACCGCTAAACTGAAAGTT</b> GTTTTAGAGCTAGAAATAGC                           | Bold: MscI; Underlined: sgRNA-neg                                     |
| 4084  | AACTTATAGGATCC <b>GCGGCCGCT</b> AGTCAGACATCATGCTGATCTAGA                                        | Bold: NotI                                                            |
| 4102  | GCTTCTTATTTTTATGGTACGTATAATTTAAAGGGTTATGGCTGT                                                   |                                                                       |
| 4103  | TCTCCTTTACTGCAGGAGCTAAATAAACTGTTTTAGTACCTGATG                                                   |                                                                       |
| 4135  | AGTTTTATTTAGCTCCTGCAAGATCTGAGCTCGATCTAAAG                                                       |                                                                       |
| 4136  | AGAGACCGGTCAGATCTGC <b>ACTGCAGA</b> AATTCGCCCTCCT                                               | Bold: PstI                                                            |
| 4143  | GACAGCTAGCTCAGT <b>CCTAGGCCGCGATT</b> TCCAATGAGGT                                               | Bold: AvrII                                                           |
| 4144  | CTTTCAGTTTAGCGGTCT <b>TGGCCA</b> ATTGTACAACACGAGCCCAT                                           | Bold: MscI                                                            |
| 4162  | TCTCCTTTACTGCAG <b>GAGCTC</b> ACTTCATAACTATCGTTTTCTATC                                          | Bold: SacI                                                            |
| 4168  | AGTCATAACCCCTTATATTT <b>CATTAATTA</b> AGTTAAATTTTTGTATATTCAAAAAGCTCT                            | Bold: PacI                                                            |
| 4169  | TGCGTCGACTCTCCTCTTACCCTCCTGAATGCCACTTC                                                          |                                                                       |
| 4170  | GTAAAGAGGAGAGTCGACGCATGGATAAGAAATACTCAATAGGC                                                    |                                                                       |
| 4171  | TACGATTCTCCGACGT <b>GTATACCT</b> TCTACGAGCTGTCG                                                 | Bold: BstZ171                                                         |
| 4172  | CTAGGAGGTGACTAA <b>CTCGAG</b> CAAAAACATCGTAGAAATACG                                             | Bold: XhoI                                                            |
| 4173  | TTTCAGTTTAGCGGTCT <b>TGGCCA</b> TTTACAGTTTAATTATAGCA                                            | Bold: MscI                                                            |
| 4184  | AGTCCTAGGTATAATTGGCC AACTTTTCAGTTTAGCGGTCT GTTTTAGAGCTAGAAATAGC                                 |                                                                       |
| 4185  | TCGTGTTGTACAATTGGCCA AACTTTTCAGTTTAGCGGTCT GTTTTAGAGCTAGAAATAGC                                 |                                                                       |
| 4186  | AATTAACCTGTAATGGCCA AACTTTTCAGTTTAGCGGTCT GTTTTAGAGCTAGAAATAGC                                  |                                                                       |
| 4197  | AGGGTAAAGAGGAGAG <b>TGCAGC</b> CATGGATAAAAAATATAGTATAGGATTAGCAATAGGAA                           | Bold: Sall; Underlined: D10A                                          |
| 4198  | ATCATCTTTAAGAAAATTTGTGGTACTATT <b>GCATCTACATCATAATCACTTAATCT</b>                                | Underlined: H840A                                                     |
| 4199  | TGTAGAT <b>GCA</b> ATAGTACCACAAAAGTTTTCTAAAGATGATTCTATAGATAA                                    | Underlined: H840A                                                     |
| 4200  | TCTACGATGTTTT <b>GCTCGAG</b> TTAATCACCACCTAATTGAGATAAA                                          | Bold: XhoI                                                            |
| 4234  | AATTAACCTGTAAT <b>TGGCCA</b> <u>GCAGCTCTTTCCCTACTTC</u> GTTTTAGAGCTAGAAATAGC                    | Bold: MscI; Underlined: sgRNA-ftsZ-1                                  |
| 4235  | AATTAACCTGTAAT <b>TGGCCA</b> <u>TTTGCCAAGCCTGCAACCAC</u> GTTTTAGAGCTAGAAATAGC                   | Bold: MscI; Underlined: sgRNA-ftsZ-2                                  |
| 4236  | AATTAACCTGTAAT <b>TGGCCA</b> <u>ATCTTACCTCAAATGCAAA</u> GTTTTAGAGCTAGAAATAGC                    | Bold: MscI; Underlined: sgRNA-ftsZ-3                                  |
| 4238  | AATTAACCTGTAAT <b>TGGCCA</b> <u>AGACCGCTAAACTGAAAGTT</u> GTTTTAGAGCTAGAAATAGC                   | Bold: MscI; Underlined: sgRNA-neg                                     |
| 4277  | AATTAACCTGTAAT <b>TGGCCA</b> <u>ATATCTTCTGCTGCAACAC</u> GTTTTAGAGCTAGAAATAGC                    | Bold: MscI; Underlined: sgRNA-slpA-1                                  |
| 4278  | AATTAACCTGTAAT <b>TGGCCA</b> <u>GTTACTTTATCTCCCTCTGC</u> GTTTTAGAGCTAGAAATAGC                   | Bold: MscI; Underlined: sgRNA-slpA-2                                  |
| 4279  | AATTAACCTGTAAT <b>TGGCCA</b> <u>GGAAATCTTATCTAATGGAA</u> GTTTTAGAGCTAGAAATAGC                   | Bold: MscI; Underlined: sgRNA-pbp-1                                   |
| 4280  | AATTAACCTGTAAT <b>TGGCCA</b> <u>AGCATTITGGATACCTGCAT</u> GTTTTAGAGCTAGAAATAGC                   | Bold: MscI; Underlined: sgRNA-pbp-2                                   |
| P2281 | <b>GTGGCTAGCC</b> CTTATTAACGTTGATATAATTTAAATTTTATTGAC                                           | Bold: NheI                                                            |
| P2282 | <b>GTGGGATCCT</b> TAAAGCACCGGTGGAGTG                                                            | Bold: BamHI                                                           |

All sequences are 5' to 3'

TABLE S3. Guide RNA base-pairing regions

| <b>sgRNA-</b>     | <b>Sequence</b>      |
|-------------------|----------------------|
| <i>neg</i>        | AGACCGCTAAACTGAAAGTT |
| <i>rfp</i>        | AACTTTCAGTTTAGCGGTCT |
| <i>ftsZ-1</i>     | GCAGCTCTTTCCCTACTTC  |
| <i>ftsZ-2</i>     | TTTGCCAAGCCTGCAACCAC |
| <i>ftsZ-3</i>     | ATCTTACCTTCAAATGCAAA |
| <i>slpA-1</i>     | ATATCTTCTGCTGCAAACAC |
| <i>slpA-2</i>     | GTTACTTTATCTCCCTCTGC |
| <i>pbp-0712-1</i> | GGAAATCTTATCTAATGGAA |
| <i>pbp-0712-2</i> | AGCATTTTGGATACCTGCAT |

All sequences are 5' to 3'

## References

- Fagan, R.P., and Fairweather, N.F. (2011). *Clostridium difficile* Has Two Parallel and Essential Sec Secretion Systems. *Journal of Biological Chemistry* 286, 27483-27493.
- McAllister, K.N., Bouillaut, L., Kahn, J.N., Self, W.T., and Sorg, J.A. (2017). Using CRISPR-Cas9-mediated genome editing to generate *C. difficile* mutants defective in selenoproteins synthesis. *Sci Rep* 7, 14672.
- Ng, Y.K., Ehsaan, M., Philip, S., Collery, M.M., Janoir, C., Collignon, A., Cartman, S.T., and Minton, N.P. (2013). Expanding the repertoire of gene tools for precise manipulation of the *Clostridium difficile* genome: allelic exchange using *pyrE* alleles. *PloS one* 8, e56051.
- Peters, J.M., Colavin, A., Shi, H., Czarny, T.L., Larson, M.H., Wong, S., Hawkins, J.S., Lu, C.H.S., Koo, B.M., Marta, E., *et al.* (2016). A Comprehensive, CRISPR-based Functional Analysis of Essential Genes in Bacteria. *Cell* 165, 1493-1506.
- Qi, L.S., Larson, M.H., Gilbert, L.A., Doudna, J.A., Weissman, J.S., Arkin, A.P., and Lim, W.A. (2013). Repurposing CRISPR as an RNA-guided platform for sequence-specific control of gene expression. *Cell* 152, 1173-1183.
- Ransom, E.M., Ellermeier, C.D., and Weiss, D.S. (2015). Use of mCherry Red fluorescent protein for studies of protein localization and gene expression in *Clostridium difficile*. *Applied and environmental microbiology* 81, 1652-1660.
